# Supplementary material
Source: PubMed Central journal article supplement (PMC3536121)
Supplement: AEM.02546-12_zam999103982so1.pdf [file AEM.02546-12_zam999103982so1.pdf]

## **Supplemental Material**

### **Bacterial chitinolytic communities respond to chitin and pH alteration in soil**

Anna M. Kielak<sup>1#</sup>, Mariana Silvia Cretoiu<sup>1</sup>, Alexander V. Semenov<sup>1</sup>, Søren J. Sørensen<sup>2</sup>, Jan Dirk van Elsas<sup>1</sup>

# Corresponding author: Anna M. Kielak, phone: +31503632161, email: a.m.kielak@rug.nl

<sup>1</sup>Department of Microbial Ecology, Centre for Ecological and Evolutionary Studies, University of Groningen, Nijenborgh 7, 9747 AG Groningen, The Netherlands

<sup>2</sup>Department of Biology, University of Copenhagen, Copenhagen, Denmark

A

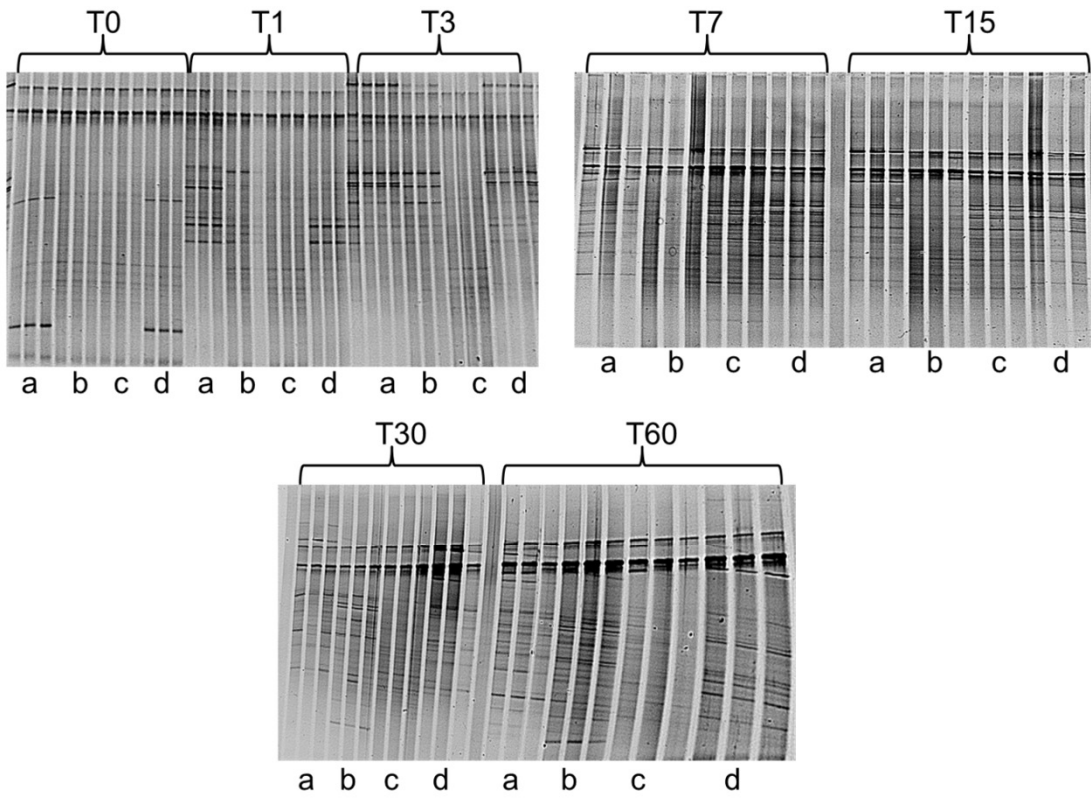

B

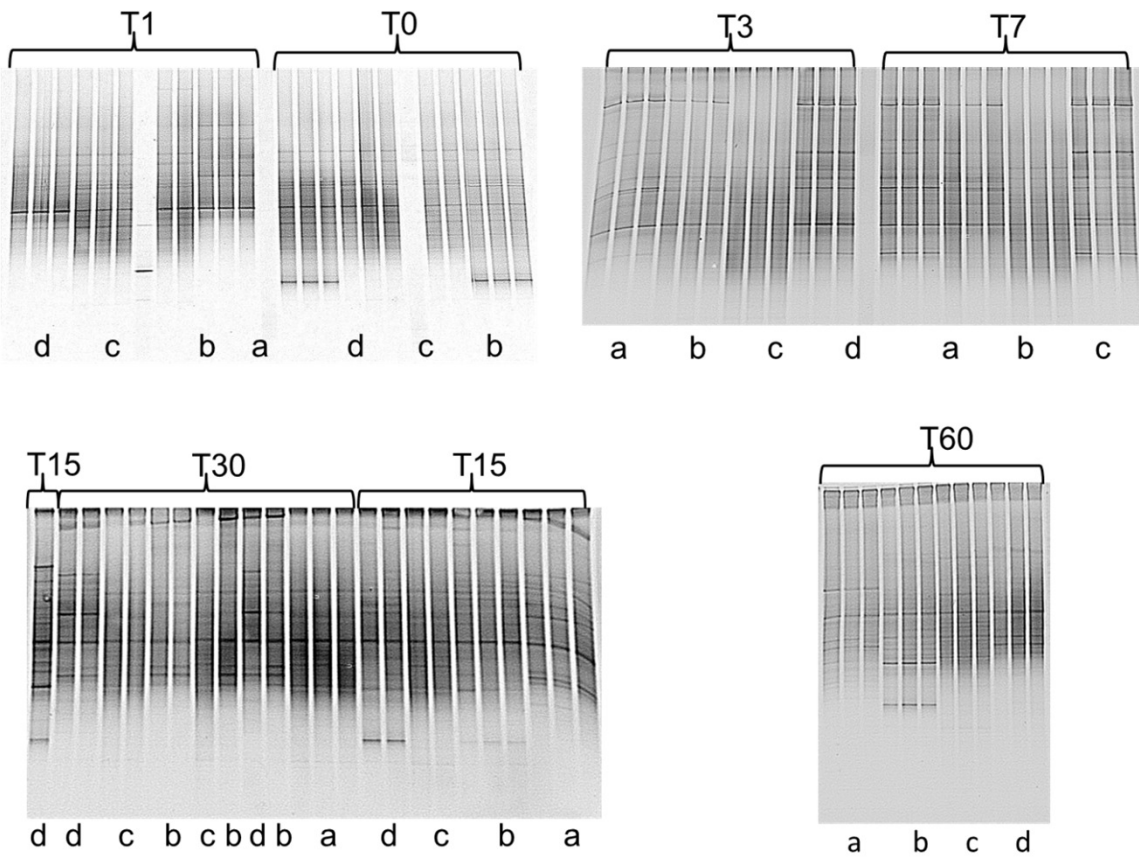

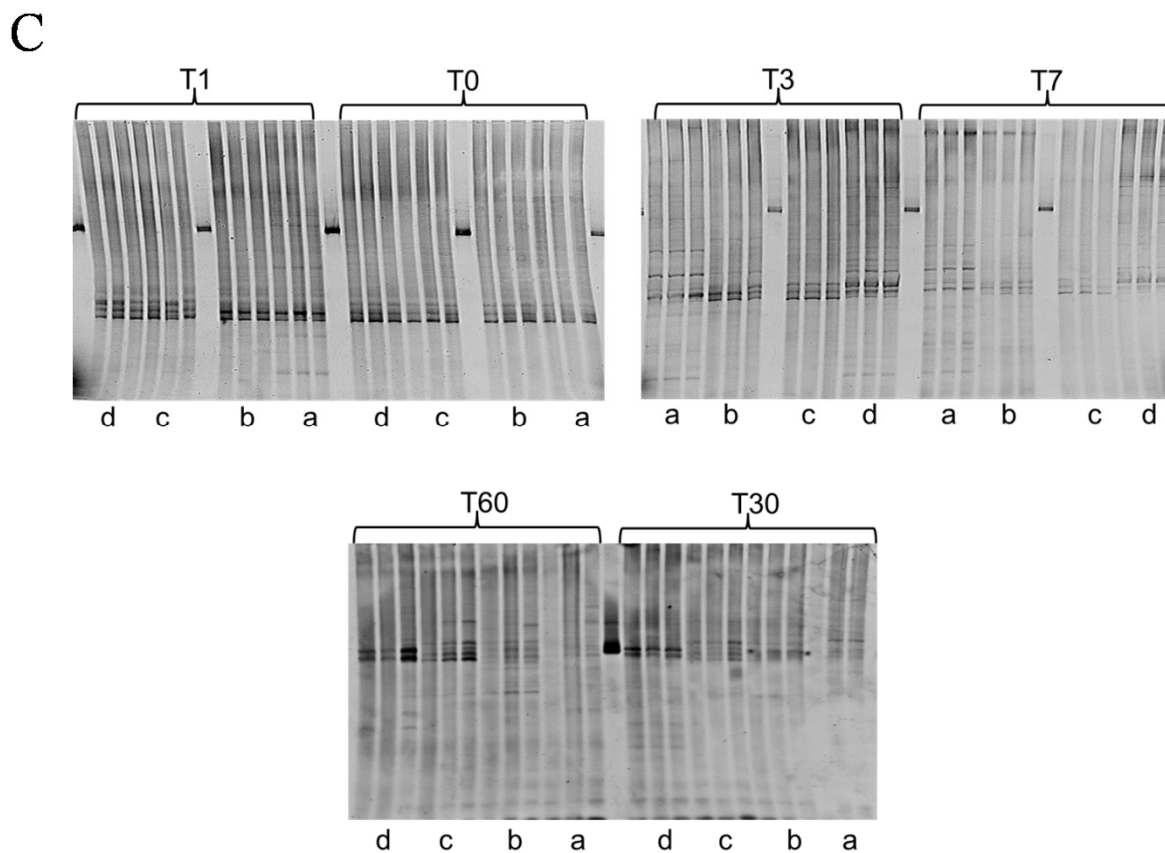

**Figure S1.** (A) 16S rRNA (B) actinobacterial 16S rRNA (C) *chiA* gene-based denaturing gradient gel electrophoresis profiles. Replicates are indicated by the same letter: a – soil pH 8.7 with chitin, b- soil pH 8.7 without chitin, c- soil pH 5.7 without chitin, d- soil pH 5.7 with chitin. Day of sampling in indicated above photos.

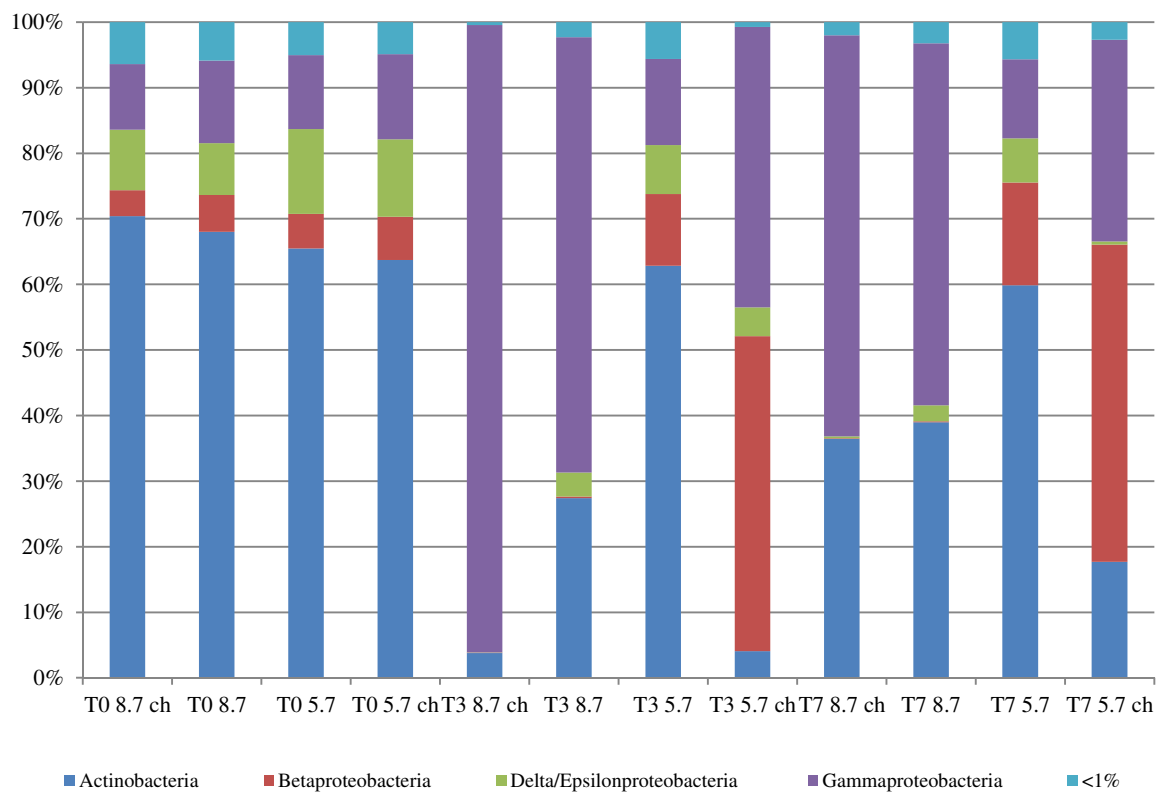

**Figure S2.** Comparison of *chiA* gene diversity between the different sampling points. Stacked column graph represents the relative distribution of the *chiA* genes affiliated with different bacterial phyla based on BLASTP analysis. All calculations were performed on normalized data. Relative abundance was calculated as a ration between sequence type aundance and total number of sequences in the group.

**Table S1.** Chitinases identified in as the best blastp hit in de dataset. Species affiliation, chitinase accession number, number of OTUs having certain chitinase as the best hit, The range of the identity of OUT representing sequence. All calculations were performed on normalized data. Relative abundance was calculated as a ration between sequence type aundance and total number of sequences in the group.

| <b>Best hit</b>                             | <b>Accession number</b> | <b>OUTs<br/>Nr</b> | <b>Highest<br/>score</b> | <b>Lowest<br/>score</b> |
|---------------------------------------------|-------------------------|--------------------|--------------------------|-------------------------|
| <i>Janthinobacterium lividum</i>            | AAA83223                | 48                 | 99                       | 59                      |
| <i>Stenotrophomonas maltophilia</i>         | AAB70917                | 285                | 100                      | 64                      |
| <i>Doohwaniella chitinasigens</i>           | AAF21468                | 6                  | 65                       | 56                      |
| <i>Streptomyces fradiae</i>                 | AAQ94055                | 16                 | 83                       | 71                      |
| <i>Streptomyces griseobrunneus</i>          | AAT67213                | 28                 | 96                       | 64                      |
| <i>Lysobacter enzymogenes</i>               | AAT77163                | 25                 | 85                       | 64                      |
| <i>Lysobacter enzymogenes</i>               | ABI63600                | 80                 | 89                       | 63                      |
| <i>Stenotrophomonas maltophilia R551-3</i>  | ACF50247                | 89                 | 100                      | 67                      |
| <i>Streptosporangium roseum DSM 43021</i>   | ACZ89829                | 162                | 100                      | 65                      |
| <i>Kribbella flavida DSM 17836</i>          | ADB30382                | 19                 | 88                       | 58                      |
| <i>Kribbella flavida DSM 17836</i>          | ADB33963                | 78                 | 91                       | 64                      |
| <i>Isoptericola jiangsuensis</i>            | ADD17351                | 63                 | 81                       | 61                      |
| <i>Thermobispora bispora DSM 43833</i>      | ADG89561                | 23                 | 96                       | 68                      |
| <i>Streptomyces bingchenggensis BCW-1</i>   | ADI05425                | 68                 | 92                       | 65                      |
| <i>Amycolatopsis mediterranei U32</i>       | ADJ42100                | 125                | 95                       | 65                      |
| <i>Amycolatopsis mediterranei U32</i>       | ADJ44263                | 136                | 94                       | 66                      |
| <i>Micromonospora aurantiaca ATCC 27029</i> | ADL48027                | 102                | 93                       | 65                      |
| <i>Stigmatella aurantiaca DW4/3-1</i>       | ADO72547                | 56                 | 90                       | 67                      |
| <i>Micromonospora sp. L5</i>                | ADU09300                | 68                 | 86                       | 65                      |
| <i>Cellulomonas fimi ATCC 484</i>           | AEE47275                | 41                 | 86                       | 61                      |
| <i>Streptomyces sp. AJ9463</i>              | BAE47186                | 30                 | 88                       | 67                      |

|                                              |           |     |     |    |
|----------------------------------------------|-----------|-----|-----|----|
| <i>Saccharopolyspora erythraea</i> NRRL 2338 | CAM05726  | 4   | 62  | 58 |
| <i>Stenotrophomonas maltophilia</i> K279a    | CAQ44264  | 118 | 100 | 66 |
| <i>Streptomyces scabiei</i> 87.22            | CBG69972  | 64  | 92  | 67 |
| <i>Streptomyces avermitilis</i> MA-4680      | NP_824054 | 190 | 95  | 64 |
| <i>Streptomyces avermitilis</i> MA-4680      | NP_828094 | 71  | 96  | 68 |
| <i>Myxococcus fulvus</i> HW-1                | AEI66376  | 9   | 84  | 65 |
| <i>Streptosporangium roseum</i> DSM 43021    | ACZ85265  | 31  | 100 | 61 |
| <i>Cellulomonas</i> sp. GM13                 | AAF00931  | 52  | 66  | 52 |

**Table S2.** Mean (standard deviation) *chiA*-types abundance in microcosm experiment.

| Row Labels                                                                                           | T0<br>pH5.7<br>chitin | T0<br>pH8.7<br>chitin | T0<br>pH8.7    | T0<br>pH5.7    | T3<br>pH5.7<br>chitin | T3<br>pH8.7<br>chitin | T3<br>pH8.7    | T3<br>pH5.7     | T7<br>pH5.7<br>chitin | T7<br>pH8.7<br>chitin | T7<br>pH8.7      | T7<br>pH5.7    |
|------------------------------------------------------------------------------------------------------|-----------------------|-----------------------|----------------|----------------|-----------------------|-----------------------|----------------|-----------------|-----------------------|-----------------------|------------------|----------------|
| <i>Janthinoba</i><br><i>cterium</i><br><i>lividum</i><br>AAA83223                                    | 0.44<br>(0.06)        | 0.5<br>(0.56)         | 0.92<br>(1.15) | 0.32<br>(0.09) | 47.88<br>(3.22)       | 0.01<br>(0.01)        | 0.08<br>(0.09) | 0.91<br>(0.42)  | 50.59<br>(6.21)       | 0.05<br>(0.02)        | 0.07<br>(0.06)   | 1.7<br>(1.29)  |
| <i>Stenotropho</i><br><i>monas</i><br><i>maltophilia</i><br>AAB70917                                 | 1.62<br>(0.5)         | 1.3<br>(0.32)         | 2.05<br>(1.03) | 1.5<br>(0.15)  | 5.99<br>(1.52)        | 43.53<br>(9.91)       | 38.44<br>(5.3) | 1.58<br>(0.55)  | 4.65<br>(0.89)        | 38.17<br>(7.19)       | 35.71<br>(11.75) | 1.43<br>(0.17) |
| <i>Cellulomon</i><br><i>as</i> sp.<br>GM13                                                           | 2.56<br>(0.19)        | 3.38<br>(0.87)        | 3.41<br>(0.47) | 2.48<br>(0.42) | 0.18<br>(0.08)        | 0.21<br>(0.04)        | 2.83<br>(2.77) | 2.04<br>(0.39)  | 0.18<br>(0.01)        | 0.44<br>(0.02)        | 2.29<br>(0.74)   | 2.06<br>(0.48) |
| AAF00931<br><i>Doohwaniel</i><br><i>la</i><br><i>chitinasi</i><br><i>gen</i><br><i>s</i><br>AAF21468 | 6.07<br>(1.23)        | 3.41<br>(1.27)        | 4.63<br>(1.62) | 5.06<br>(0.86) | 0.33<br>(0.14)        | 0.01<br>(0.01)        | 0.13<br>(0.08) | 10.13<br>(2.27) | 0.17<br>(0.09)        | 0.01<br>(0.01)        | 0.11<br>(0.06)   | 13.9<br>(3.02) |
| <i>Streptomyce</i><br><i>s</i><br><i>fradiae</i><br>AAQ94055                                         | 1.54<br>(2.42)        | 0.22<br>(0.13)        | 0.27<br>(0.26) | 0.18<br>(0.16) | 0.03<br>(0.01)        | 0.01<br>(0)           | 0.06<br>(0.06) | 0.09<br>(0.07)  | 0.1<br>(0.04)         | 0.15<br>(0.2)         | 0.11<br>(0.09)   | 0.09<br>(0.05) |
| <i>Streptomyce</i><br><i>s</i><br><i>griseobrunn</i><br><i>eus</i><br>AAT67213                       | 0.02<br>(0.04)        | 0.23<br>(0.09)        | 0.15<br>(0.15) | 0.17<br>(0.03) | 0.01<br>(0.01)        | 0.14<br>(0.11)        | 0.11<br>(0.04) | 0.07<br>(0.04)  | 0.37<br>(0.25)        | 1.14<br>(0.44)        | 0.1<br>(0.03)    | 0.2<br>(0.17)  |
| <i>Lysobacter</i><br><i>enzymogene</i><br><i>s</i><br>AAT77163                                       | 2.47<br>(0.4)         | 1.59<br>(0.38)        | 2.11<br>(0.23) | 2.03<br>(0.26) | 0.81<br>(0.3)         | 1.23<br>(0.63)        | 7.62<br>(3.33) | 2.13<br>(0.15)  | 1.59<br>(0.27)        | 2.43<br>(1.15)        | 10<br>(6.32)     | 1.86<br>(0.15) |
| <i>Lysobacter</i><br><i>enzymogene</i><br><i>s</i><br>ABI63600                                       | 8.65<br>(1.05)        | 5.95<br>(0.96)        | 7.56<br>(1.59) | 7.48<br>(1.01) | 0.54<br>(0.12)        | 0.07<br>(0.02)        | 4.34<br>(4.72) | 9.01<br>(0.69)  | 0.86<br>(0.21)        | 0.13<br>(0.03)        | 1.07<br>(0.27)   | 8.58<br>(1.11) |
| <i>Stenotropho</i><br><i>monas</i><br><i>maltophilia</i><br>R551-3                                   | 0.05<br>(0.02)        | 0.31<br>(0.44)        | 0.18<br>(0.12) | 0.05<br>(0.02) | 4.82<br>(0.86)        | 6.6<br>(1.41)         | 2.05<br>(0.84) | 0.06<br>(0.03)  | 3.3<br>(1.66)         | 3.19<br>(1.09)        | 1.12<br>(0.08)   | 0.06<br>(0.06) |
| ACF50247<br><i>Streptospor</i><br><i>angium</i><br><i>roseum</i><br>DSM 43021                        | 1.47<br>(0.78)        | 0.84<br>(0.3)         | 0.87<br>(0.24) | 1.14<br>(0.17) | 0.05<br>(0.03)        | 0.02<br>(0.02)        | 0.82<br>(0.21) | 1.83<br>(0.34)  | 0.04<br>(0.02)        | 0.14<br>(0.02)        | 1.36<br>(0.47)   | 2.11<br>(0.28) |
| ACZ85265<br><i>Streptospor</i><br><i>angium</i><br><i>roseum</i><br>DSM 43021                        | 3.88<br>(0.33)        | 5.32<br>(1.49)        | 4.11<br>(0.34) | 4.53<br>(0.62) | 0.37<br>(0.12)        | 0.18<br>(0.07)        | 1.56<br>(0.66) | 3.55<br>(0.25)  | 2.84<br>(0.08)        | 0.24<br>(0.08)        | 1.86<br>(0.28)   | 3.39<br>(0.52) |
| ACZ89829<br><i>Kribbella</i><br><i>flavida</i><br>DSM 17836                                          | 3.36<br>(0.94)        | 2.82<br>(1.7)         | 2.34<br>(0.08) | 2.41<br>(0.99) | 0.17<br>(0.03)        | 0.05<br>(0.03)        | 1.14<br>(0.67) | 2.49<br>(0.31)  | 0.48<br>(0.26)        | 0.13<br>(0.1)         | 1.47<br>(0.66)   | 2.22<br>(0.55) |
| ADB30382<br><i>Kribbella</i><br><i>flavida</i><br>DSM 17836                                          | 5.89<br>(0.86)        | 8.14<br>(0.76)        | 5.67<br>(1)    | 6.07<br>(0.67) | 0.27<br>(0.11)        | 0.28<br>(0.29)        | 3.08<br>(0.09) | 5.66<br>(0.88)  | 0.15<br>(0.08)        | 0.36<br>(0.1)         | 4.07<br>(0.68)   | 5.69<br>(1.11) |
| ADB33963<br><i>Isoptericola</i><br><i>jiangsuensis</i><br>ADD17351                                   | 0.06<br>(0.06)        | 0.22<br>(0.11)        | 0.24<br>(0.14) | 0.09<br>(0.07) | 1.04<br>(0.51)        | 0.86<br>(0.06)        | 0.16<br>(0.06) | 0.09<br>(0.01)  | 7.77<br>(1.19)        | 29.66<br>(1.47)       | 0.27<br>(0.11)   | 0.1<br>(0.03)  |

|                                                             |                 |                 |                 |                 |                 |                 |                 |                 |                 |                |                |                 |
|-------------------------------------------------------------|-----------------|-----------------|-----------------|-----------------|-----------------|-----------------|-----------------|-----------------|-----------------|----------------|----------------|-----------------|
| <i>Thermobispora bispora</i><br>DSM 43833<br>ADG89561       | 0.35<br>(0.19)  | 0.6<br>(0.36)   | 0.31<br>(0.15)  | 0.36<br>(0.03)  | 0<br>(0)        | 0<br>(0)        | 0.16<br>(0.04)  | 0.22<br>(0.06)  | 0<br>(0.01)     | 0.02<br>(0.01) | 0.27<br>(0.11) | 0.38<br>(0.09)  |
| <i>Streptomyces bingchenggensis</i> BCW-1 ADI05425          | 2.07<br>(0.31)  | 1.9<br>(0.23)   | 2.21<br>(0.72)  | 2.15<br>(0.7)   | 0.13<br>(0.02)  | 0.13<br>(0.09)  | 0.87<br>(0.27)  | 3.65<br>(2.69)  | 0.18<br>(0.07)  | 0.16<br>(0.05) | 1.21<br>(0.13) | 2.28<br>(0.84)  |
| <i>Amycolatopsis mediterranea</i> U32<br>ADJ42100           | 6.64<br>(0.96)  | 7.01<br>(0.5)   | 8.09<br>(0.79)  | 8.25<br>(2.38)  | 0.23<br>(0.02)  | 0.23<br>(0.07)  | 2.47<br>(0.78)  | 6.92<br>(0.71)  | 0.4<br>(0.23)   | 0.48<br>(0.03) | 3.61<br>(0.39) | 6.97<br>(1.11)  |
| <i>Amycolatopsis mediterranea</i> U32<br>ADJ44263           | 5.34<br>(0.75)  | 8.93<br>(1.12)  | 7.84<br>(1)     | 6.37<br>(2.2)   | 0.11<br>(0.05)  | 0.2<br>(0.09)   | 2.34<br>(0.29)  | 4.93<br>(0.25)  | 0.29<br>(0.22)  | 0.38<br>(0.09) | 3.56<br>(0.43) | 4.41<br>(0.8)   |
| <i>Streptomyces avermitilis</i> MA-4680<br>NP_824054        | 12.19<br>(2.31) | 10.12<br>(1.94) | 12.47<br>(0.81) | 11.33<br>(0.8)  | 0.53<br>(0.14)  | 0.41<br>(0.22)  | 4.25<br>(0.24)  | 12.78<br>(1.33) | 0.83<br>(0.19)  | 0.78<br>(0.08) | 7<br>(0.48)    | 12.63<br>(1.42) |
| <i>Streptomyces avermitilis</i> MA-4680<br>NP_828094        | 5.29<br>(0.7)   | 4.58<br>(1.14)  | 5.32<br>(0.83)  | 5.81<br>(0.75)  | 0.09<br>(0.02)  | 0.16<br>(0.07)  | 1.78<br>(0.77)  | 4.51<br>(0.63)  | 0.11<br>(0.04)  | 0.19<br>(0.1)  | 2.7<br>(0.52)  | 3.91<br>(0.28)  |
| <i>Saccharopolyspora erythraea</i><br>NRRL 2338<br>CAM05726 | 1.61<br>(0.69)  | 2.11<br>(0.64)  | 1.61<br>(0.24)  | 1.17<br>(0.24)  | 0.02<br>(0.02)  | 0.02<br>(0.01)  | 0.57<br>(0.06)  | 1.23<br>(0.49)  | 0.06<br>(0.02)  | 0.09<br>(0.06) | 1.07<br>(0.32) | 1.36<br>(0.29)  |
| <i>Stenotrophomonas maltophilia</i> K279a<br>CAQ44264       | 0.25<br>(0.14)  | 0.54<br>(0.15)  | 0.65<br>(0.44)  | 0.24<br>(0.24)  | 30.71<br>(6.48) | 44.42<br>(9.06) | 13.91<br>(5.55) | 0.34<br>(0.26)  | 19.28<br>(3.93) | 17.9<br>(5.18) | 6.92<br>(0.94) | 0.2<br>(0.11)   |
| <i>Streptomyces scabiei</i> 87.22<br>CBG69972               | 2.32<br>(0.17)  | 2.13<br>(0.41)  | 2.64<br>(0.1)   | 2.23<br>(0.69)  | 0.18<br>(0.03)  | 0.34<br>(0.13)  | 0.92<br>(0.06)  | 3.18<br>(0.54)  | 1<br>(0.41)     | 0.56<br>(0.12) | 1.7<br>(0.38)  | 2.48<br>(0.43)  |
| <i>Micromonospora aurantiaca</i><br>ATCC 27029<br>ADL48027  | 3.1<br>(0.36)   | 4.36<br>(0.95)  | 3.47<br>(1.04)  | 2.33<br>(0.87)  | 0.11<br>(0.04)  | 0.1<br>(0.07)   | 1.27<br>(0.16)  | 2.53<br>(0.33)  | 0.28<br>(0.13)  | 0.33<br>(0.08) | 2.21<br>(0.44) | 2.76<br>(0.61)  |
| <i>Stigmatella aurantiaca</i> DW4/3-1<br>ADO72547           | 11<br>(6.98)    | 7.41<br>(2.2)   | 7.31<br>(1.18)  | 12.07<br>(5.06) | 3.94<br>(2.74)  | 0.05<br>(0.02)  | 3.48<br>(2.65)  | 7.13<br>(5.22)  | 0.4<br>(0.15)   | 0.38<br>(0.26) | 1.93<br>(0.45) | 6.08<br>(4.95)  |
| <i>Micromonospora</i> sp. L5<br>ADU09300                    | 3.01<br>(1.17)  | 4.89<br>(0.68)  | 4.43<br>(0.43)  | 3.92<br>(1.38)  | 0.11<br>(0.05)  | 0.08<br>(0.07)  | 1.55<br>(0.59)  | 3.46<br>(0.39)  | 0.2<br>(0.04)   | 0.27<br>(0.07) | 2.44<br>(0.77) | 3.87<br>(0.9)   |
| <i>Cellulomonas fimi</i><br>ATCC 484<br>AEE47275            | 1.62<br>(0.71)  | 1.45<br>(0.43)  | 1.63<br>(0.29)  | 2.82<br>(2)     | 0.05<br>(0.04)  | 0.05<br>(0.03)  | 1.1<br>(0.37)   | 1.96<br>(0.52)  | 0.04<br>(0.02)  | 0.06<br>(0.06) | 1.24<br>(0.04) | 2.14<br>(1.47)  |
| <i>Myxococcus fulvus</i> HW-1<br>AEI66376                   | 0.58<br>(0.6)   | 0.61<br>(0.26)  | 0.65<br>(0.37)  | 1.54<br>(1.41)  | 0.17<br>(0.1)   | 0<br>(0)        | 0.19<br>(0.07)  | 0.21<br>(0.27)  | 0.01<br>(0.01)  | 0.04<br>(0.04) | 0.5<br>(0.26)  | 0.34<br>(0.16)  |
| <i>Streptomyces</i> sp.<br>AJ9463<br>BAE47186               | 1.67<br>(0.73)  | 1.02<br>(0.8)   | 1<br>(0.26)     | 0.87<br>(0.32)  | 0.39<br>(0.15)  | 0.18<br>(0.04)  | 0.4<br>(0.18)   | 1.61<br>(0.44)  | 1.36<br>(0.66)  | 0.27<br>(0.18) | 0.75<br>(0.29) | 1.16<br>(0.21)  |
